# Supplementary material for: Somatic mutations are present in all members of the AKT family in endometrial carcinoma
Source: PubMed Central journal article supplement (PMC2768084; doi:10.1038/sj.bjc.6605301), 2009-09-08
Supplement: 6605301x1.pdf [file 6605301x1.pdf]

## Sequencing trace

## Mass spectrometry genotyping validation

## Alignment of mutated residue across species

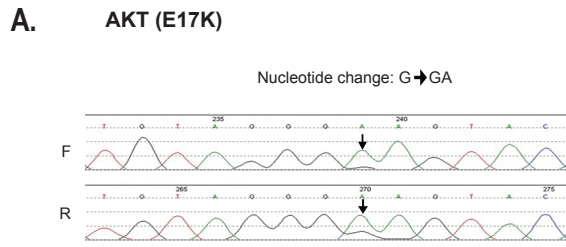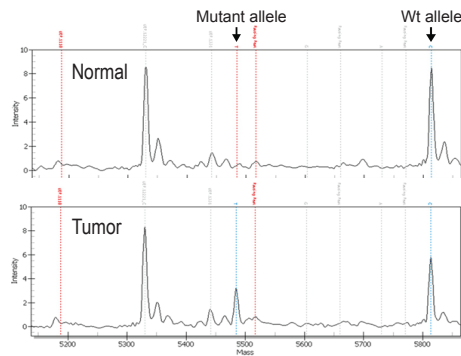

Human **K E G W L H K R G E Y I K T W R P R Y F**

Mouse **K E G W L H K R G E Y I K T W R P R Y F**

Rat **K E G W L H K R G E Y I K T W R P R Y F**

Chick **K E G W L H K R G E Y I K T W R P R Y F**

Frog **K E G W L H K R G E Y I K T W R P R Y F**

Fly **K E G W L M K R G E H I K N W R Q R Y F**

Worm **I E G W L H K K G E H I R N W R P R Y F**

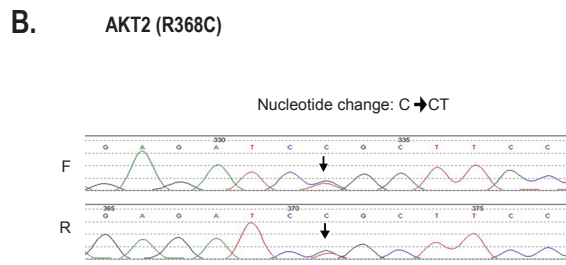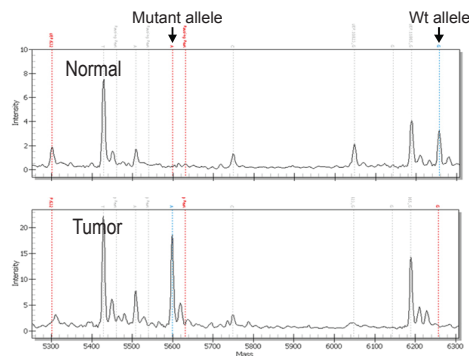

Human **L F E L I L M E E I R F P R T L S P E A K**

Mouse **L F E L I L M E D I K F P R T L S S D A K**

Rat **L F E L I L M E D I K F P R T L S S D A K**

Chick **L F E L I L M E E I R F P R T L S P E A K**

Frog **L F E L I L M E E I R F P R T L S P E A K**

Fly **L F T L I L V E E V K F P R N I T D E A K**

Worm **L F E L I M A G D L R F P S K L S Q E A R**

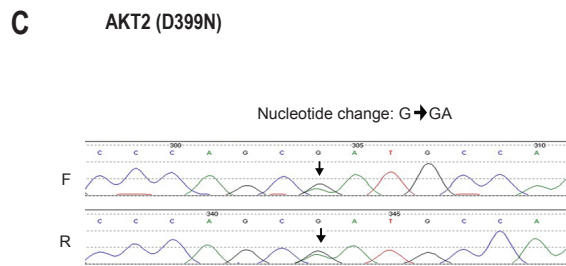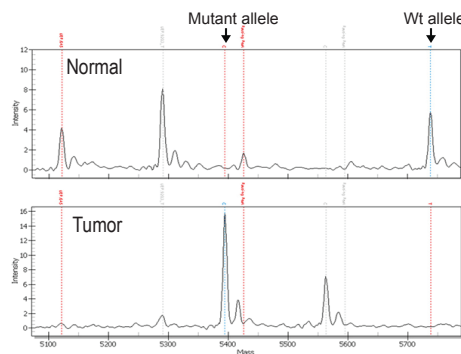

Human **P K Q R L G G G P S D A K E V M E H R F F**

Mouse **P N K R L G G G P D D A K E I M R H S F F**

Rat **P N K R L G G G P D D P K E I M R H S F F**

Chick **P K Q R L G G G P T D A Q E V M E H R F F**

Frog **P K Q R L G G G P N D A Q E V M S H R F F**

Fly **P K K R L G G G K D D V K E I Q A H P F F**

Worm **P T Q R L G G G P E D A L E I C R A D F F**

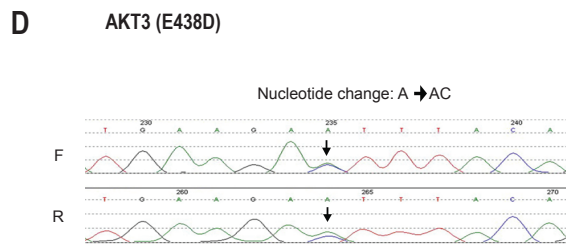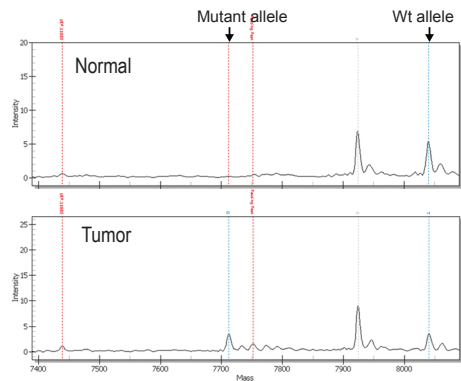

Human **E T D T R Y F D E E F T A Q T I T I**

Mouse **E T D T R Y F D E E F T A Q T I T I**

Rat **E T D T R Y F D E E F T A Q T I T I**

Chick **E T D T R Y F D E E F T A Q T I T I**

Fly **D T D T R Y F D K E F T G E S V E L**

Worm **E T D T S Y F D N E F T S Q P V Q L**

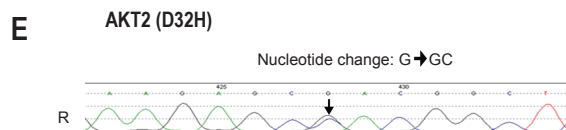

Genotyping Data not available

Human **W R P R Y F L L K S D G S F I G Y K E R P**

Mouse **W R P R Y F L L K T D G S F I G Y K E K P**

Rat **W R P R Y F L L K T D G S F I G Y K E K P**

Chick **W R P R Y F L L K S D G S F I G Y K E K P**

Fly **W R Q R Y F V L H S D G R L M G Y R S K P**

Worm **W R P R Y F M I F N D G A L L G F R A K P**
